# Supplementary material
Source: publisher figshare collection journal article supplement (https://asha.figshare.com/articles/dataset/_/13133018)
Supplement: Supplementary file 1 [file 1]

## Supplemental Material S2.

Pearson product–moment correlation coefficients for pairs of dependent measures computed for children with hearing aids (HAs).

|                               | Mal    | PA     | PP    | Vocab | WM    | Narr |
|-------------------------------|--------|--------|-------|-------|-------|------|
| Malapropism Recognition (Mal) | 1      |        |       |       |       |      |
| Phonological Awareness (PA)   | .430   | 1      |       |       |       |      |
| Phonological Processing (PP)  | .480*  | .805** | 1     |       |       |      |
| Vocabulary (Vocab)            | .673** | .292   | .484* | 1     |       |      |
| Working Memory (WM)           | .391   | .585** | .504* | .308  | 1     |      |
| Oral Narrative (Narr)         | .639** | .348   | .481* | .485* | .493* | 1    |

Note. \* $p < .05$ . \*\* $p < .01$ .
