# Supplementary material
Source: publisher figshare collection journal article supplement (https://asha.figshare.com/articles/dataset/_/13133018)
Supplement: Supplementary file 2 [file 1]

### Supplemental Material S1.

Pearson product–moment correlation coefficients for pairs of dependent measures computed for children with normal hearing (NH).

|                               | Mal    | PA     | PP     | Vocab | WM   | Narr |
|-------------------------------|--------|--------|--------|-------|------|------|
| Malapropism Recognition (Mal) | 1      |        |        |       |      |      |
| Phonological Awareness (PA)   | .171   | 1      |        |       |      |      |
| Phonological Processing (PP)  | .408** | .556** | 1      |       |      |      |
| Vocabulary (Vocab)            | .467** | –.115  | .198   | 1     |      |      |
| Working Memory (WM)           | –.008  | .457** | .407** | .044  | 1    |      |
| Oral Narrative (Narr)         | .240   | .129   | .256   | .248  | .132 | 1    |

Note. \* $p < .05$ . \*\* $p < .01$ .
