# Supplementary material
Source: publisher figshare collection journal article supplement (https://asha.figshare.com/articles/dataset/_/13133018)
Supplement: Supplementary file 3 [file 1]

### Supplemental Material S3.

Pearson product–moment correlation coefficients for pairs of dependent measures computed for children with cochlear implants (CIs).

|                               | Mal    | PA     | PP     | Vocab  | WM   | Narr |
|-------------------------------|--------|--------|--------|--------|------|------|
| Malapropism Recognition (Mal) | 1      |        |        |        |      |      |
| Phonological Awareness (PA)   | .688** | 1      |        |        |      |      |
| Phonological Processing (PP)  | .583** | .610** | 1      |        |      |      |
| Vocabulary (Vocab)            | .620** | .419** | .629** | 1      |      |      |
| Working Memory (WM)           | .279*  | .177   | .360** | .435** | 1    |      |
| Oral Narrative (Narr)         | .479** | .399** | .290*  | .401** | .183 | 1    |

Note. \* $p < .05$ . \*\* $p < .01$ .
